# Supplementary material
Source: publisher site journal article supplement (https://www.dovepress.com/article/606964)
Supplement: Supplementary file 1 [file 606964_Appendix%201.pdf]

**Appendix 1.** Consolidated criteria for reporting qualitative studies (COREQ): 32-item checklist <sup>56</sup>

(Transformational leadership among women surgeons, Switzerland, 2025)

| No                                             | Item                                     | Guide questions/description                                                                                                                                     |                                                                                                                                                                               |
|------------------------------------------------|------------------------------------------|-----------------------------------------------------------------------------------------------------------------------------------------------------------------|-------------------------------------------------------------------------------------------------------------------------------------------------------------------------------|
| <b>Domain 1: Research team and reflexivity</b> |                                          |                                                                                                                                                                 |                                                                                                                                                                               |
| Personal Characteristics                       |                                          |                                                                                                                                                                 |                                                                                                                                                                               |
| 1.                                             | Interviewer/facilitator                  | Which author/s conducted the interview or focus group?                                                                                                          | LK conducted all semi-structured interviews                                                                                                                                   |
| 2.                                             | Credentials                              | What were the researcher's credentials?<br><i>E.g. PhD, MD</i>                                                                                                  | MD                                                                                                                                                                            |
| 3.                                             | Occupation                               | What was their occupation at the time of the study?                                                                                                             | Surgeon, MBA student                                                                                                                                                          |
| 4.                                             | Gender                                   | Was the researcher male or female?                                                                                                                              | female                                                                                                                                                                        |
| 5.                                             | Experience and training                  | What experience or training did the researcher have?                                                                                                            | received training in qualitative research                                                                                                                                     |
| Relationship with participants                 |                                          |                                                                                                                                                                 |                                                                                                                                                                               |
| 6.                                             | Relationship established                 | Was a relationship established prior to study commencement?                                                                                                     | none                                                                                                                                                                          |
| 7.                                             | Participant knowledge of the interviewer | What did the participants know about the researcher? <i>e.g. personal goals, reasons for doing the research</i>                                                 | Participants were aware that this research was part of an MBA thesis and that the goal was to develop a curriculum                                                            |
| 8.                                             | Interviewer characteristics              | What characteristics were reported about the interviewer/facilitator? <i>e.g. Bias, assumptions, reasons and interests in the research topic</i>                | gender, profession, domain                                                                                                                                                    |
| <b>Domain 2: study design</b>                  |                                          |                                                                                                                                                                 |                                                                                                                                                                               |
| Theoretical framework                          |                                          |                                                                                                                                                                 |                                                                                                                                                                               |
| 9.                                             | Methodological orientation and Theory    | What methodological orientation was stated to underpin the study? <i>e.g. grounded theory, discourse analysis, ethnography, phenomenology, content analysis</i> | The study adopted a sequential combination of thematic analysis and directed content analysis                                                                                 |
| Participant selection                          |                                          |                                                                                                                                                                 |                                                                                                                                                                               |
| 10.                                            | Sampling                                 | How were participants selected? <i>e.g. purposive, convenience, consecutive, snowball</i>                                                                       | purposive sampling; focus on diverse demographic backgrounds (age, geographic location, specialty)                                                                            |
| 11.                                            | Method of approach                       | How were participants approached? <i>e.g. face-to-face, telephone, mail, email</i>                                                                              | email                                                                                                                                                                         |
| 12.                                            | Sample size                              | How many participants were in the study?                                                                                                                        | 8 participants                                                                                                                                                                |
| 13.                                            | Non-participation                        | How many people refused to participate or dropped out? Reasons?                                                                                                 | Of the 20 surgeons contacted, 9 agreed to participate. One participant had to interrupt the interview halfway through and the interview was therefore excluded from analysis. |
| Setting                                        |                                          |                                                                                                                                                                 |                                                                                                                                                                               |
| 14.                                            | Setting of data collection               | Where was the data collected? <i>e.g. home, clinic, workplace</i>                                                                                               | via ZOOM                                                                                                                                                                      |
| 15.                                            | Presence of non-participants             | Was anyone else present besides the participants and researchers?                                                                                               | no                                                                                                                                                                            |
| 16.                                            | Description of sample                    | What are the important characteristics of the sample? <i>e.g. demographic data, date</i>                                                                        | LIC: 2, LMIC: 2, UMIC: 1, HIC: 3; 5 different continents; 7 different surgical specialties;                                                                                   |
| Data collection                                |                                          |                                                                                                                                                                 |                                                                                                                                                                               |

|                                        |                                |                                                                                                                                          |                                                                                                         |
|----------------------------------------|--------------------------------|------------------------------------------------------------------------------------------------------------------------------------------|---------------------------------------------------------------------------------------------------------|
| 17.                                    | Interview guide                | Were questions, prompts, guides provided by the authors? Was it pilot tested?                                                            | yes, see “methods”                                                                                      |
| 18.                                    | Repeat interviews              | Were repeat interviews carried out? If yes, how many?                                                                                    | no                                                                                                      |
| 19.                                    | Audio/visual recording         | Did the research use audio or visual recording to collect the data?                                                                      | both audio- and video-recording                                                                         |
| 20.                                    | Field notes                    | Were field notes made during and/or after the interview or focus group?                                                                  | no                                                                                                      |
| 21.                                    | Duration                       | What was the duration of the interviews or focus group?                                                                                  | 56 minutes on average                                                                                   |
| 22.                                    | Data saturation                | Was data saturation discussed?                                                                                                           | yes, see “methods”                                                                                      |
| 23.                                    | Transcripts returned           | Were transcripts returned to participants for comment and/or correction?                                                                 | Transcripts were not returned to participants for comment or correction.                                |
| <b>Domain 3: analysis and findings</b> |                                |                                                                                                                                          |                                                                                                         |
| Data analysis                          |                                |                                                                                                                                          |                                                                                                         |
| 24.                                    | Number of data coders          | How many data coders coded the data?                                                                                                     | one researcher                                                                                          |
| 25.                                    | Description of the coding tree | Did authors provide a description of the coding tree?                                                                                    | There is no description of the coding tree.                                                             |
| 26.                                    | Derivation of themes           | Were themes identified in advance or derived from the data?                                                                              | Codes were derived from the data and in a second step mapped onto pre-identified themes, see “methods”  |
| 27.                                    | Software                       | What software, if applicable, was used to manage the data?                                                                               | MaxQDA, see “methods”                                                                                   |
| 28.                                    | Participant checking           | Did participants provide feedback on the findings?                                                                                       | no                                                                                                      |
| Reporting                              |                                |                                                                                                                                          |                                                                                                         |
| 29.                                    | Quotations presented           | Were participant quotations presented to illustrate the themes / findings? Was each quotation identified? e.g. <i>participant number</i> | Key findings of this study were supported with selected quotes in tables 2 and 3.                       |
| 30.                                    | Data and findings consistent   | Was there consistency between the data presented and the findings?                                                                       | All findings are derived from the data and all themes are supported by one or more illustrative quotes. |
| 31.                                    | Clarity of major themes        | Were major themes clearly presented in the findings?                                                                                     | see "results" and tables 2 and 3                                                                        |
| 32.                                    | Clarity of minor themes        | Is there a description of diverse cases or discussion of minor themes?                                                                   | see "results"                                                                                           |
